# Supplementary material for: A primal-dual approximation algorithm for the k-prize-collecting minimum vertex cover problem with submodular penalties
Source: Springer Nature journal article supplement (doi:10.1007/s11704-022-1665-9), 2022-10-22
Supplement: 11704_2022_1665_MOESM1_ESM.pdf [file 11704_2022_1665_MOESM1_ESM.pdf]

A primal-dual approximation  
algorithm for the  $k$ -prize-collecting  
minimum vertex cover problem with  
submodular penalties

**Xiaofei LIU, Weidong LI, Jinhua YANG**

Frontiers of Computer Science, DOI: [10.1007/s11704-022-1665-9](https://doi.org/10.1007/s11704-022-1665-9)

# Problems & Ideas

- the  $k$ -prize-collecting minimum vertex cover problem with submodular penalties:

Given a graph  $G=(V,E)$ , an integer  $k$ , a cost function  $c$  and a submodular penalty function  $\pi$ . This problem finds a  $(S,R)$  such that at least  $k$  edges are covered by  $S$  and  $\min(c(S)+\pi(R))$ .

- Ideas: 1. guess the maximum cost vertex  $v_{max}^*$  in an optimal solution; 2. construct a feasible solution based on the two-phase primal-dual algorithm and  $v_{max}^*$ .

---

**Algorithm 1:** The two-phase primal-dual algorithm

---

**Input:** An instance  $I = (G; c, \pi; k)$  of the  $k$ -PCVCS.  
**Output:** A feasible pair  $(S, R)$ .

- 1 Set  $V^{tight} = \emptyset$ ,  $E^{act} = E$ ,  $y_e = 0$  for any  $e \in E$  and  $\gamma = 0$ .
- 2 **while**  $E^{act} \neq \emptyset$  **do**
- 3     Keep  $\gamma = 0$  and increase  $\{y_e\}_{e \in E^{act}}$  simultaneously until either some vertex  $v$  becomes tight or some edge set  $E'$  becomes tight.
- 4     **if** vertex  $v$  become tight **then**
- 5          $V^{tight} := V^{tight} \cup \{v\}$ ,  $E^{act} := E^{act} \setminus \delta(v)$ .
- 6     **else**
- 7          $E^{act} := E^{act} \setminus E'$ .
- 8 **while**  $|\delta(V^{tight})| < k$  **do**
- 9     Increase  $\{y_e\}_{e \in E \setminus \delta(V^{tight})}$  and  $\gamma$  simultaneously until some vertex  $v$  becomes tight.
- 10     $V^{tight} := V^{tight} \cup \{v\}$ .
- 11  $S := V^{tight}$  and  $R := E \setminus \delta(V^{tight})$ . Output  $(S, R)$ .

---

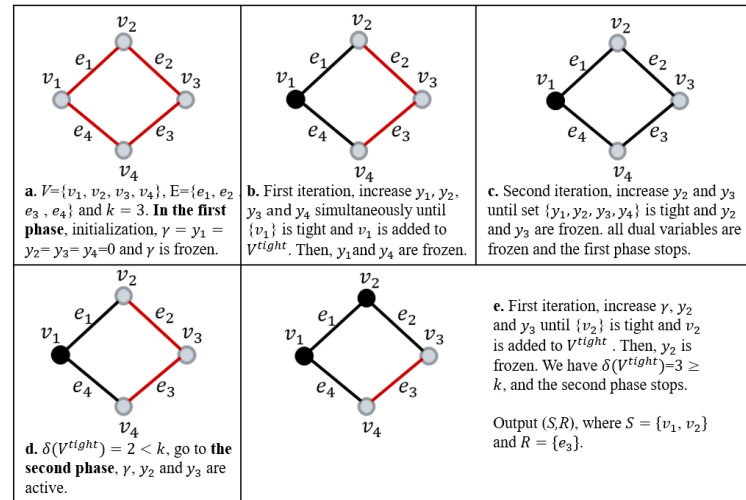

Left: the two-phase primal-dual algorithm.; Right: a, b and c are the Phase 1 of the two-phase primal-dual algorithm, and e and f are the Phase 2 of the two-phase primal-dual algorithm

# Main Contributions

- Contributions:
  - We proposed the  $k$ -prize-collecting minimum vertex cover problem with submodular penalties, which is a generalization of many well-known vertex cover problem;
  - We presented a two-phase algorithm based on the guessing technique and the primal-dual framework;
  - We proved that the approximation factor of this algorithm is 3, when the submodular penalty cost function is normalized and nondecreasing. In particular, when the submodular penalty cost function is linear, we proved that its approximation factor is 2.

---

**Algorithm 2:**

---

**Input:** An instance  $\mathcal{I} = (G; c, \pi; k)$  of the  $k$ -PCVCS.

**Output:** A feasible pair  $(S, R)$ .

```
1 for  $v \in V$  do
2   Construct the auxiliary instance  $\mathcal{I} \setminus \{v\}$ ;
3   Using Algorithm 1, find a feasible solution
    $(S_v, R_v)$  of instance  $\mathcal{I} \setminus \{v\}$ 
4 Let  $v' = \arg \min_{v \in V} (c(S_v) + \pi(S_v) + c(v))$ , and output
    $(S, R) = (S_{v'} \cup \{v'\}, R_{v'})$ .
```

---

The two-phase algorithm for the  $k$ -prize-collecting minimum vertex cover problem with submodular penalties.
